# Supplementary material
Source: PubMed Central journal article supplement (PMC3117185)
Supplement: mmc1.pdf [file mmc1.pdf]

**Supporting Materials for “Preparation and Properties of Asymmetric Large Unilamellar Vesicles: Interleaflet Coupling in Asymmetric Vesicles is Dependent Upon Temperature but Not Curvature”** by Hui-Ting Cheng and Erwin London

**A**

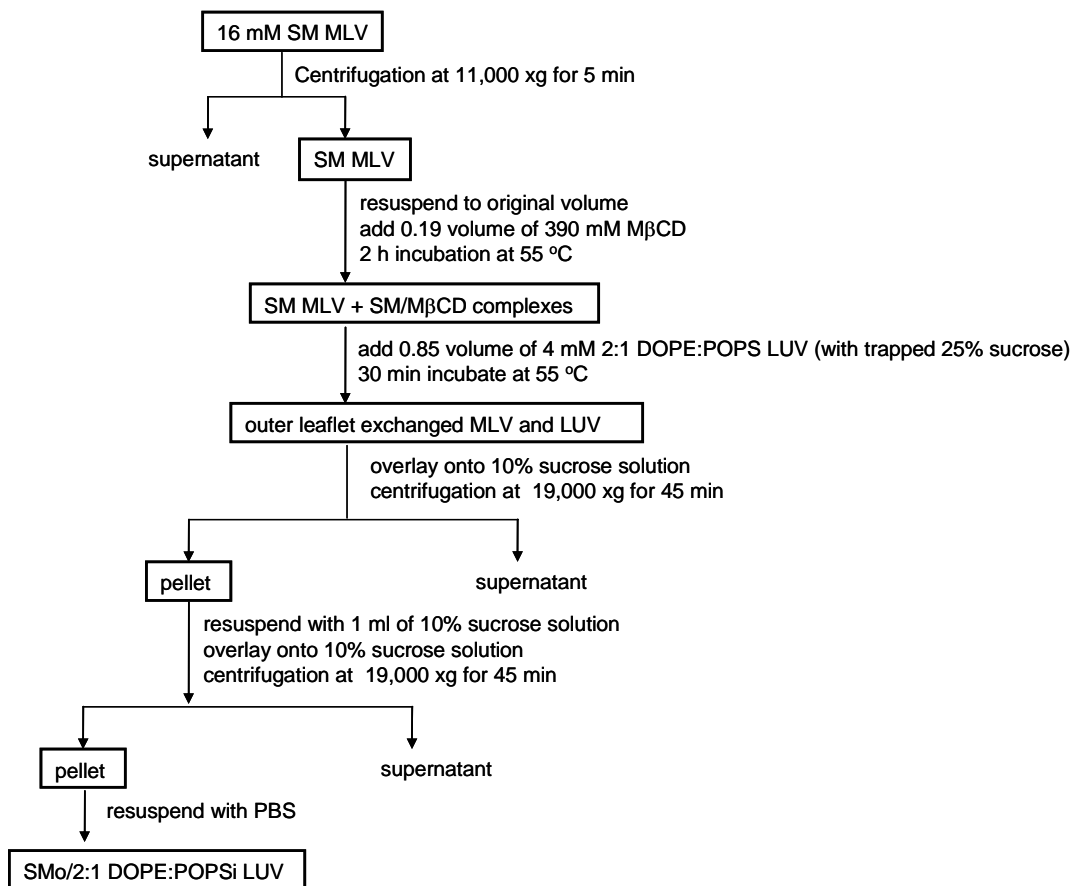

**B**

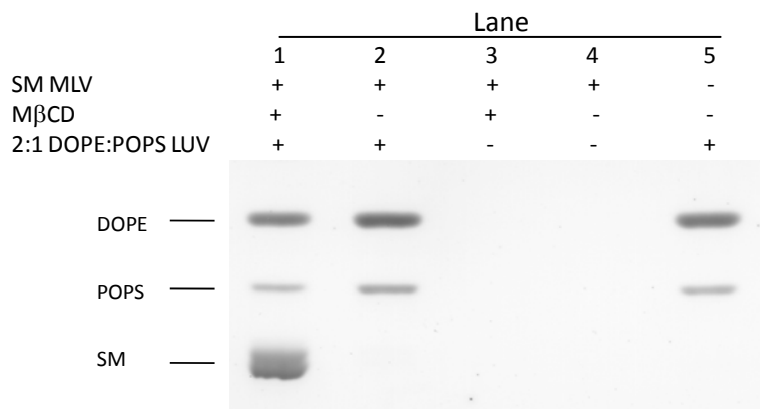

**Figure S1** Preparation of asymmetric LUVs. (A) Flow chart of method for preparation of asymmetric SMo/2:1 DOPE:POPSi LUVs. (B) TLC analysis of final pellet from asymmetric LUV protocol. SM MLVs (lanes 1 to 4) or PBS (lane 5) were incubated with (lane 1 and 3) or without (lanes 2, 4, and 5) MβCD for 2h and 2:1 DOPE:POPS LUV (lanes 1, 2, and 5) or PBS (lanes 3 and 4) were then added, and incubated for 30 min, followed by centrifugation steps. HP-TLC analysis of resuspended pellets from each LUV preparation was performed as described in Materials and Methods.

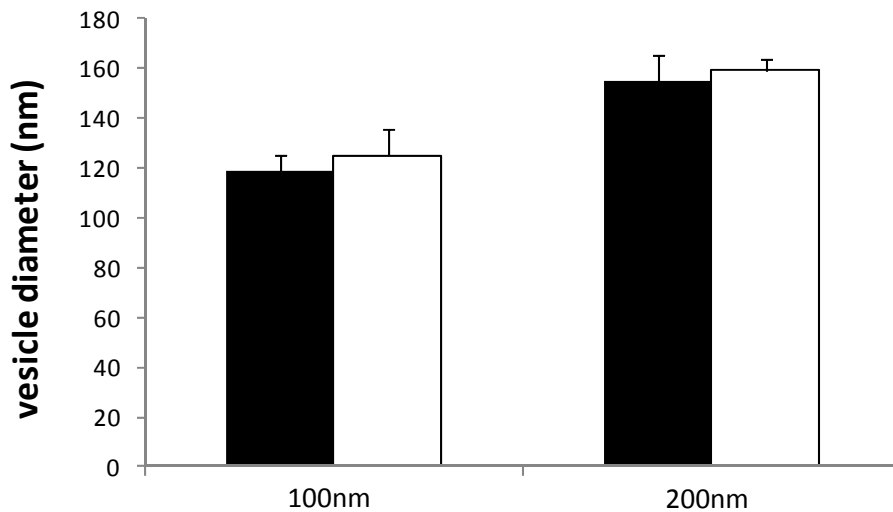

**Figure S2.** Comparison of vesicle sizes before and after M $\beta$ CD-induced lipid exchange. 2:1 DOPE:POPS LUV were prepared by extrusion through either a 100 nm-pore size or 200 nm-pore size polycarbonate filter. LUV vesicle sizes before (black bar: 2:1 DOPE:POPS LUV) and after (white bar: SMO/2:1 DOPE:POPSi LUV) exchange were determined by dynamic light scattering. Average vesicle diameter and S.D. (represented by error bars) were obtained from 5 different preparations in samples prepared using a 100 nm-pore size filter (labeled as 100 nm in the figure) and from 3 different preparations in samples prepared using a 200 nm-pore size filter (labeled as 200 nm in the figure).

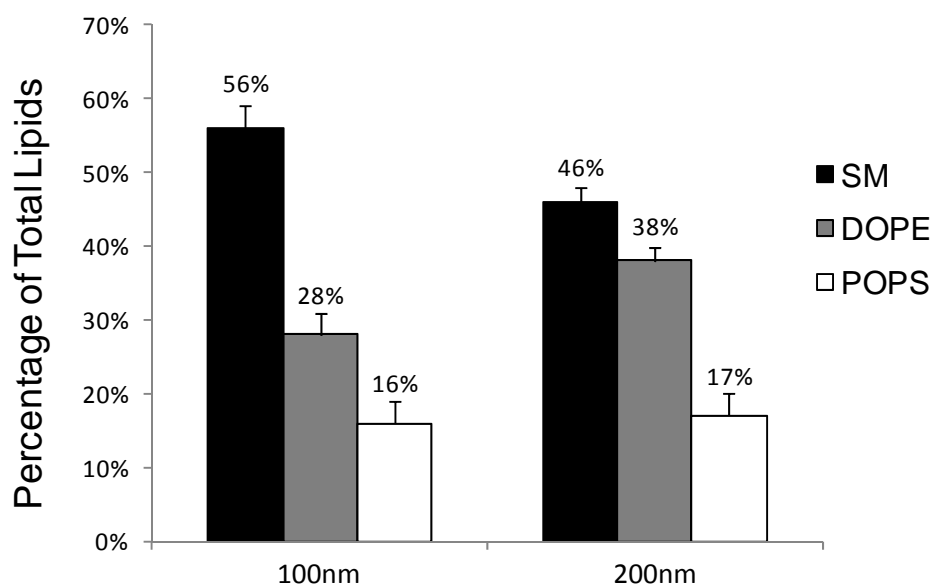

**Figure S3.** Lipid composition of asymmetric SM<sub>0</sub>/2:1 DOPE:POPSi LUVs. Lipid composition was analyzed by HP-TLC. Average values and S.D. from 8 different preparations made using 100 nm-pore size filters (labeled as 100 nm in the figure) and from 3 different preparations made using 200 nm-pore size filters (labeled as 200 nm in the figure) are shown.

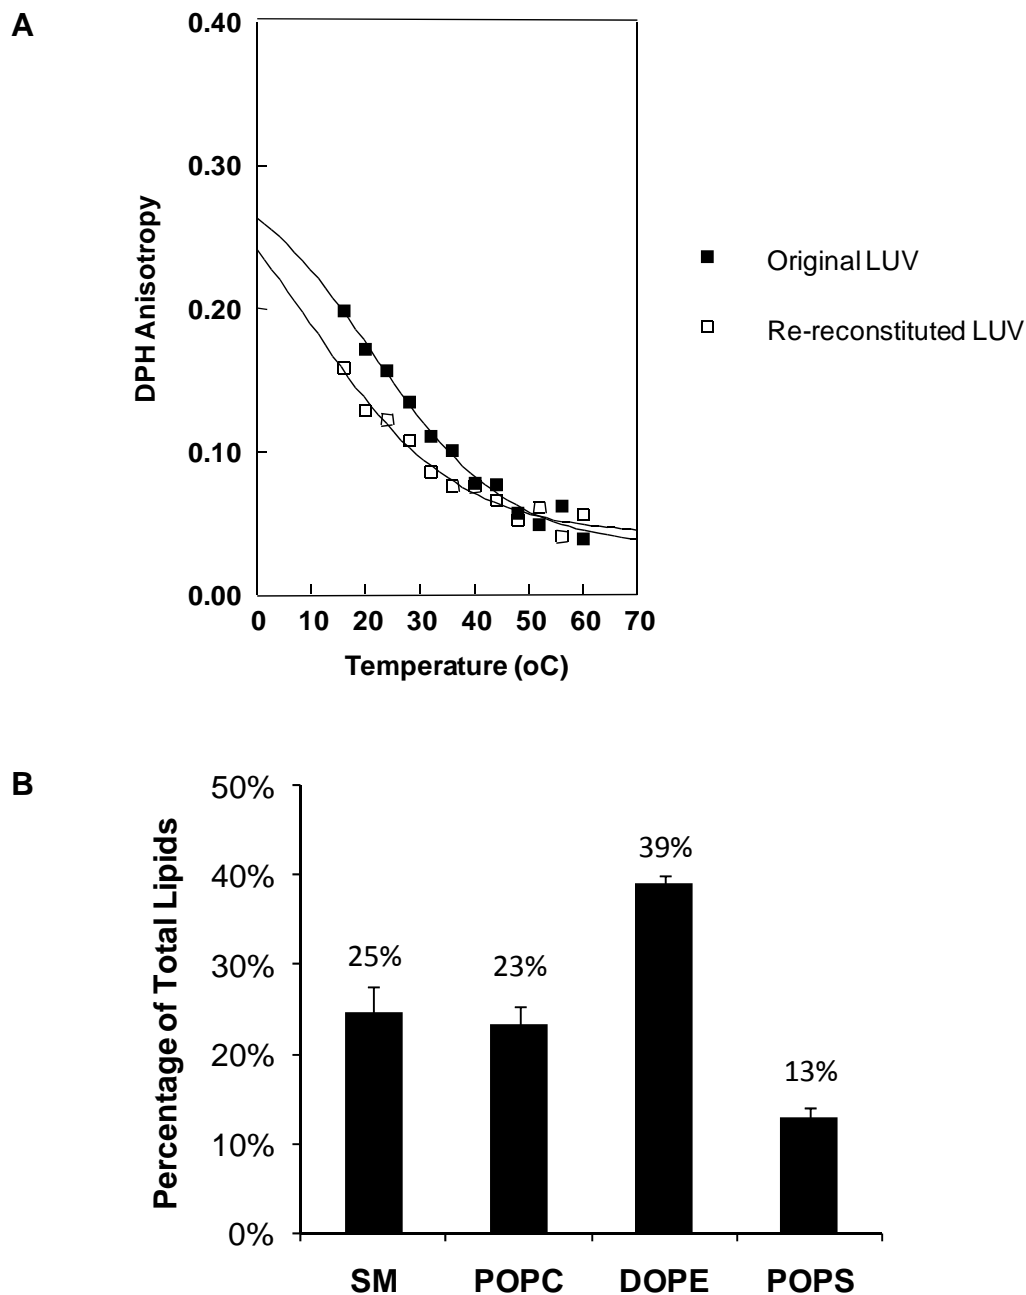

**Figure S4.** Preparation of asymmetric 1:1 SM:POPC<sub>0</sub>/2:1 DOPE:POPS<sub>i</sub> LUVs. (A) Temperature dependence of DPH anisotropy in original (asymmetric) and re-reconstituted LUVs. Rereconstituted LUVs were made by dissolving the asymmetric vesicles in solvent and reforming them into ordinary (symmetric vesicles). See methods for details. Symbols: ■: original (asymmetric) LUVs, □: re-reconstituted LUVs. (B) Lipid composition of asymmetric 1:1 SM:POPC<sub>0</sub>/2:1 DOPE:POPS<sub>i</sub> LUVs. Lipid compositions were analyzed by HP-TLC. Average values and S.D. from 3 different preparations in samples made using 100 nm-pore size filters are shown.

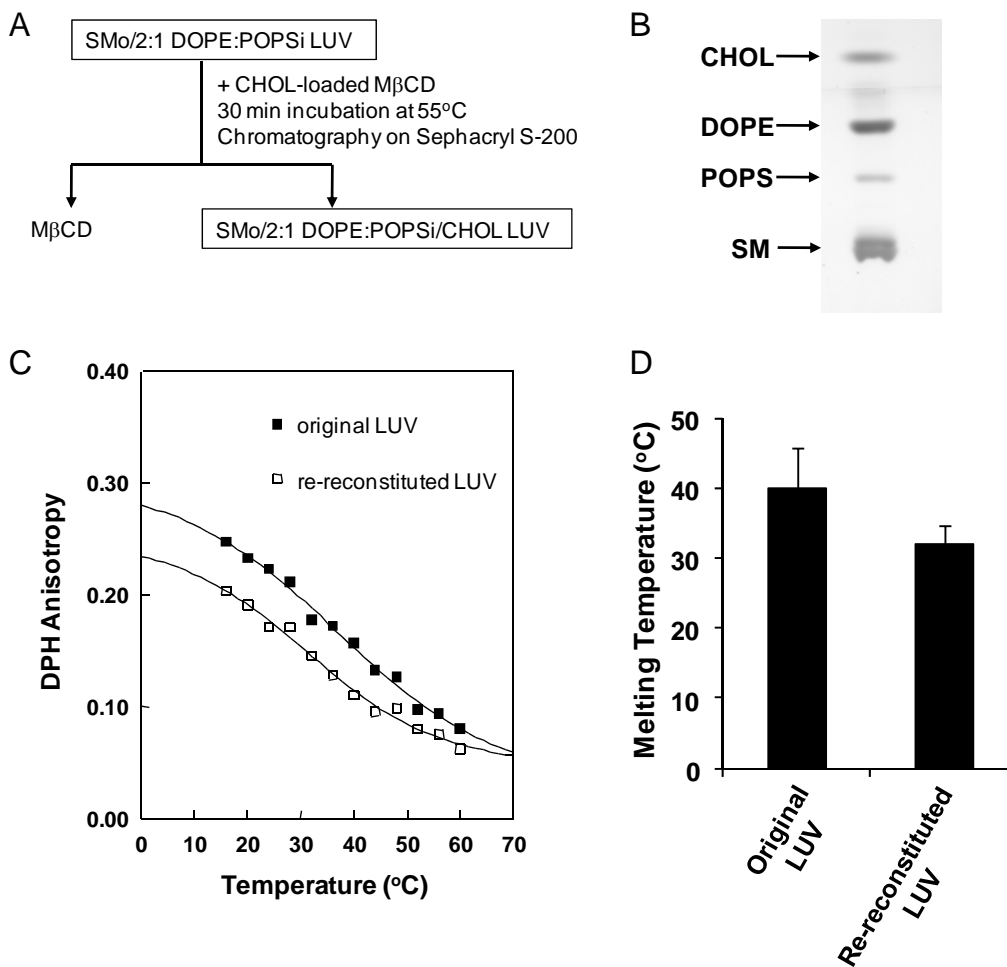

**Figure S5.** Preparation of SMo/2:1 DOPE:POPSi/CHOL LUVs. (A) Flow chart of method for preparation of asymmetric SMo/2:1 DOPE:POPSi/CHOL LUVs from SMo/2:1 DOPE:POPSi LUVs. (B) HP-TLC analysis of combined LUV-containing fractions. In this preparation, total lipid concentration was 282  $\mu$ M in a 2 ml volume. The molar ratio of SM:DOPE:POPS:CHOL was 32:34:15:19. (C) Temperature dependence of DPH anisotropy in original and re-reconstituted LUVs. Symbols: ■: original (asymmetric) LUVs, □: re-reconstituted LUVs. (D) Melting temperature of original (asymmetric) and re-reconstituted LUVs. Rereconstituted LUVs were made by dissolving the asymmetric vesicles in solvent and reforming them into ordinary (symmetric vesicles). See methods for details.

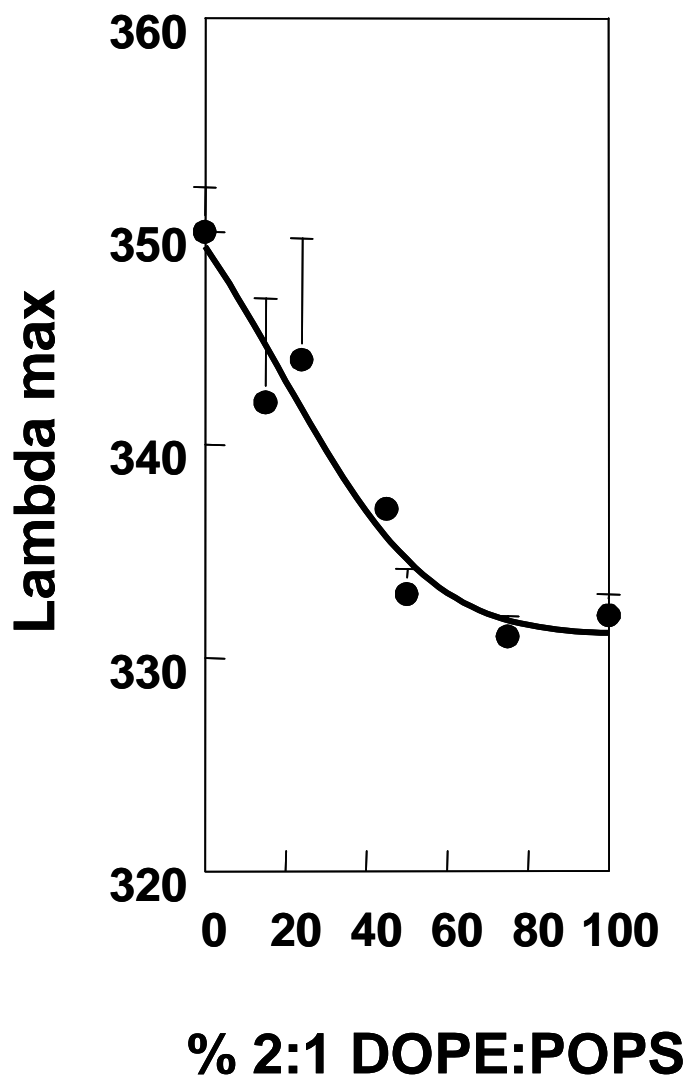

**Figure S6.** Dependence of fluorescence emission  $\lambda_{\text{max}}$  of pL4A18 peptide upon the fraction of 2:1 DOPE:POPS in ordinary (symmetric) vesicles composed of SM, DOPE and POPS and with a 2:1 DOPE:POPS ratio. % 2:1 DOPE:POPS equals sum of % DOPE + % POPS. The % SM in the vesicles is 100% - (% DOPE + %POPS). Average values and standard deviation from three samples are shown. (Point at 45% without error bar is from a single sample.)
